# Supplementary material for: Gene prioritization using Bayesian matrix factorization with genomic and phenotypic side information
Source: PubMed Central journal article supplement — Bioinformatics. 2018 Jun 27;34(13):i447–56. doi: 10.1093/bioinformatics/bty289 (PMC6022676; doi:10.1093/bioinformatics/bty289), 2018-06-27
Supplement: bty289_zakeri.129.sup.1.pdf.pdf [file bty289_zakeri.129.sup.1.pdf.pdf]

---

Supplementary Information

# Gene Prioritization Using Bayesian Matrix Factorization with Genomic and Phenotypic Side Information

Pooya Zakeri<sup>1,\*</sup>, Jaak Simm<sup>1</sup>, Adam Arany<sup>1</sup>, Sarah Elshal<sup>1</sup>, and Yves  
Moreau<sup>1,\*</sup>

<sup>1</sup>STADIUS Center for Dynamical Systems, Signal Processing and Data Analytics Department, Department of Electrical Engineering,  
KU Leuven, Leuven, 3001, Belgium.

\*To whom correspondence should be addressed.

## Abstract

**Section 1:** Supplementary notes on Probabilistic Matrix Factorization, our proposed Gibbs sampler, and our assessment strategy.

**Section 2:** A detailed discussion of our results and supplementary data.

**Contact:** pooya.zakeri@esat.kuleuven.be yves.moreau@esat.kuleuven.be

**Supplementary information:** Supplementary data are available at online.

---

## 1 Supplementary notes on Approach

### 1.1 Probabilistic Matrix Factorization

As discussed earlier, the main notion behind the probabilistic matrix factorization (PMF) (Mnih and Salakhutdinov, 2007) is to find a factorization that minimizes the mean square error (MSE) on the observed data, and maintain good performance on those observed data considered for test set, with the

assumption of Gaussian noise in the data. For example, to factorize the OMIM matrix (Amberger *et al.*, 2011) using PMF, it represents each row (gene) and each column (phenotype) by a latent vector of size  $D$ , and then find the

$$\min_{G,P} \sum_{(i,j) \in I_{\text{OMIM}}} \text{OMIM}_{i,j} - G_i^T \times P_j + \lambda_G \|G\|_F^2 + \lambda_P \|P\|_F^2 \quad (\text{S1})$$

where  $\text{OMIM}_{i,j} \in \text{OMIM}$  matrix is the observed data,  $\lambda_G$  and  $\lambda_P$  are regularization parameters and greater than zero, and  $\|\cdot\|_F$  denotes the Forbenius norm, which is defined as:

$$\|R\|_F = \sqrt{\sum_{i=1}^N \sum_{j=1}^M |r_{i,j}|^2} = \sqrt{\text{trace}(RR^T)} \quad (\text{S2})$$

PMF. Indeed, use a linear model with Gaussian observation noise. Accordingly, last two terms in the PMF optimization problem (1) are derived from the Gaussian prior with zero mean on both latent variables,  $G_i$  and  $P_j$ , and a Gaussian noise model on  $\text{OMIM}_{i,j}$ .

## 1.2 A Detailed on our proposed model

As we discussed in the manuscript, Bayesian PMF (BPMF) (Salakhutdinov and Mnih, 2008), proposes a fully Bayesian treatment of the PMF approach by introducing common multivariate Gaussian priors for latent variables. In order to complete the OMIM matrix using BPMF, similarly to PMF, BPMF also uses a linear model with Gaussian observation noise. As we shown, we propose an extended version of BPMF with the ability to work with multiple auxiliary Genomic and Phenotypic information. To incorporate the gene $\hat{\text{L}}^{\text{TM}}$ s features  $x_i \in \mathbb{R}^{F_{\text{gene}}}$  (the phenotype $\hat{\text{L}}^{\text{TM}}$ s features  $z_i \in \mathbb{R}^{F_{\text{phen}}}$ ), we integrate a term  $\beta_{\text{gene}}^T x_i$  ( $\beta_{\text{phen}}^T z_i$ ) into the Gaussian mean  $\mu_G$  ( $\mu_P$ ). Then, it was shown that the equations (3) and (4), in the original manuscript are expressed as

$$P(G, | x_i, \mu_G, \Lambda_G) = \mathcal{N}(G_i | \mu_G + \beta_{\text{gene}}^T x_i, \Lambda_G^{-1}) \quad (\text{S3})$$

$$P(P, | z_j, \mu_P, \Lambda_P) = \mathcal{N}(P_j | \mu_P + \beta_{\text{phen}}^T z_j, \Lambda_P^{-1}) \quad (\text{S4})$$

Where  $\beta_{\text{gene}} \in \mathbb{R}^{F_{\text{gene}} \times D}$  and  $\beta_{\text{phen}} \in \mathbb{R}^{F_{\text{phen}} \times D}$  have been introduced as the link matrices for the gene's (phenotype's) features.  $F_{\text{gene}}$  ( $F_{\text{phen}}$ ) is the dimension of the gene's (phenotype's) features. Theses equations above ( S3 and S4) offers the linear model for latent vectors. Technically, our proposed model learns the link matrices  $\beta_{\text{genes}}$  and  $\beta_{\text{phen}}$  to predict latent variables  $G_i$  and  $P_j$  from  $x_i$  and  $z_j$ , respectively.

To have a fully Bayesian treatment for  $\beta_{\text{gene}}$  ( $\beta_{\text{phen}}$ ), we consider a zero mean multivariate normal as its prior. However, our proposed prior on  $\beta_{\text{gene}}$  ( $\beta_{\text{phen}}$ ) scales with the precision of latent variables in order to incorporate the auxiliary information to the factorization process.

$$\begin{aligned} P(\beta_{\text{gene}}, | \Lambda_{\text{gene}}, \lambda_{\beta_{\text{gene}}}) &= \mathcal{N}(\text{vec}(\beta_{\text{gene}}) | 0, \Lambda_G^{-1} \otimes (\lambda_{\beta_{\text{gene}}} I)^{-1}) \\ &= \lambda_{\beta_{\text{gene}}}^{F_{\text{gene}} D/2} | \Lambda_G |^{\frac{D}{2}} \exp\left(\frac{1}{2} \lambda_{\beta_{\text{gene}}} \text{tr}(\beta_{\text{gene}} \Lambda_G^{-1} \beta_{\text{gene}}^T)\right) \end{aligned} \quad (\text{S5})$$

where  $\otimes$  denotes the Kronecker product, and  $\text{vec}(\beta_{\text{gene}})$  denotes the vectorization of  $\beta_{\text{gene}}$ . And  $\lambda_{\beta_{\text{gene}}} \geq 0$  is the diagonal element of the precision matrix, and  $\Lambda_G$  is the precision matrix of the latent variable for genes. This prior is natural as the scale of  $G$  is not predetermined. Accordingly, we place

a gamma distribution hyperprior<sup>1</sup> on  $\lambda_{\beta_{\text{gene}}}$ , owing the fact that the choice of  $\lambda_{\beta_{\text{gene}}}$  is problem dependent, as discussed in similar context (Porteous *et al.*, 2010).

$$P(\lambda_{\beta_{\text{gene}}} | \mu, \nu) = \text{Gamma}(\lambda_{\beta_{\text{gene}}} | \mu, \nu) \propto \lambda_{\beta_{\text{gene}}}^{\nu/2-1} \exp\left(-\frac{\nu}{2\mu} \lambda_{\beta_{\text{gene}}}\right) \quad (\text{S6})$$

where  $\mu$  and  $\nu$  are fixed hyperparameters, which are both set to 1 in the experiments. The same full Bayesian treatment is developed for  $\beta_{\text{phen}}$ .

### 1.3 A Detailed on our proposed Gibbs sampler

In this section we present the conditional distributions of the Gibbs sampler for all variables except for  $\beta_{\text{gene}}$  and  $\beta_{\text{phen}}$ . The outline of Gibbs sampling for our proposed model is as follows: Based on (4) and (5), the conditional probability for  $G_i$  and  $P_j$  are

$$\begin{aligned} P(G_i | \text{OMIM}, P, \Theta_G, x, \beta, \lambda, \alpha, \Lambda_G) &= \mathcal{N}(G_i | \mu_{G_i}^*, [\Lambda_{G_i}^*]^{-1}) \\ &\propto \prod_{j \in I_{\text{OMIM}(i, \cdot)}} \mathcal{N}(\text{OMIM}_{(i,j)} | G_i^T P_j, \alpha^{-1}) \\ &\times \mathcal{N}(G_i | \mu_G + \beta_{\text{gene}}^T x_i, \Lambda_G^{-1}) \end{aligned} \quad (\text{S7})$$

where

$$\Lambda_{G_i}^* = \Lambda_G + \alpha \sum_{(i,j) \in I_{\text{OMIM}(i, \cdot)}} P_j P_j^T \quad (\text{S8})$$

$$\mu_{G_i}^* = [\Lambda_{G_i}^*]^{-1} + (\Lambda_G (\mu_G + \beta_{\text{gene}}^T x_i) + \alpha \sum_{(i,j) \in I_{\text{OMIM}(i, \cdot)}} P_j \text{OMIM}_{(i,j)}) \quad (\text{S9})$$

From the above equations, we see that if gene  $i$  does not have features then  $\beta_{\text{gene}}^T x_i$  is 0. We also place the Normal -Wishart hyperprior for  $\mu_G$  and  $\Lambda_G$ , same as being used in BPFM.

$$P(\mu_G, \Lambda_G | \Theta_0) = \mathcal{N}(\mu_G | \mu_0^*, (\beta_0^* \Lambda_G)^{-1}) \mathcal{NW}(\Lambda_G^{-1} | W_0, \mu_0) \quad (\text{S10})$$

Where  $\mathcal{NW}$  denote the normal Wishart distributions. In this study, we set  $\mu_0 = 0$ ,  $\beta_0 = 2$  and  $\nu_0 = D$  and  $W_0$  to the identity matrix for both gene and phenotype. Combining the hyperprior in S8 with S1 we get the following conditional probability:

$$P(\mu_G, \Lambda_G | G, x, \beta_{\text{gene}}, \Theta_0) = \mathcal{N}(\mu_G | \mu_0^*, (\beta_0^* \Lambda_G)^{-1}) \mathcal{NW}(\Lambda_G^{-1} | W_0^*, \mu_0^*) \quad (\text{S11})$$

where

$$\mu_0^* = \frac{\beta_0 \mu_0 + N_G \bar{G}}{\beta_0 + N_G} \quad \beta_0^* = \beta_0 + N_G \quad \nu_0^* = \nu_0 + N_G \quad (\text{S12})$$

$$[W_0^*]^{-1} = W_0^{-1} + N_G \bar{S} + \frac{\beta_0 N_G}{\beta_0 + N_G} (\mu_0 + \bar{G})(\mu_0 + \bar{G})^T \quad (\text{S13})$$

<sup>1</sup> A hyperprior is a prior distribution on a hyperparameter, that is, on a parameter of a prior distribution.

$$\bar{U} = \frac{1}{N_G} \sum_{i=1}^{N_G} (G_i - \beta_{\text{gene}}^T x_i) \quad \bar{S} = \frac{1}{N_G} \sum_{i=1}^{N_G} (G_i - \beta_{\text{gene}}^T x_i)(G_i - \beta_{\text{gene}}^T x_i)^T \quad (\text{S14})$$

While in BPMF the Gaussian priors model the latent variables  $G_i$ , in our proposed work the Gaussian priors model the residual  $G_i - \beta_{\text{gene}}^T x_i$  instead; this being the key difference in comparison with BPMF. The conditional probability for precision parameter if the weight vector,  $\lambda(\beta_{\text{gene}})$ , can be obtained from (14) and (15)

$$P(\lambda_{\beta_{\text{gene}}} | \beta_{\text{gene}}, \Lambda_G, \mu, \nu) = \text{gamma}(\lambda_{\beta_{\text{gene}}} | \bar{\mu}, \bar{\nu}) \quad (\text{S15})$$

where

$$\bar{\nu} = F_{\text{gene}} D + \nu \quad \bar{\mu} = \frac{(F_{\text{gene}} D + \nu)\mu}{\nu + \mu \text{tr}(\beta_{\text{gene}} \Lambda_G^{-1} \beta_{\text{gene}}^T)} \quad (\text{S16})$$

Note that the conditional probability for  $\lambda_{\beta_{\text{phen}}}$  has exactly the same form.

#### 1.4 A Detailed on our Noise Injection Sampler

Based on equations S12 and S14, the conditional probability for  $\beta_{\text{gene}}$  can be reformulated as

$$\begin{aligned} & P(\beta_{\text{gene}} | \mu_{\text{gene}}, \Lambda_G, G, x, \lambda_{\beta_{\text{gene}}}) \\ & \propto \exp\left(-\frac{1}{2} \sum_{i=1}^{N_G} (G_i - \mu_G - \beta_{\text{gene}}^T x_i)^T \Lambda_G (G_i - \mu_G - \beta_{\text{gene}}^T x_i)\right) \\ & \quad - \frac{1}{2} \lambda_{\beta_{\text{gene}}} \text{tr}(\beta_{\text{gene}} \Lambda_G^{-1} \beta_{\text{gene}}^T) \end{aligned} \quad (\text{S17})$$

Let  $X$  represents  $X = [x_1, \dots, x_N]$  and  $U = [G_1 - \mu_G, \dots, G_N - \mu_G]$ . As both the likelihood and prior terms contain  $\Lambda_G$ , thus it can be factored out:

$$\begin{aligned} & P(\beta_{\text{gene}} | \mu_{\text{gene}}, \Lambda_G, G, x, \lambda_{\beta_{\text{gene}}}) \\ & \propto \exp\left(-\frac{1}{2} \text{tr}[(G - X\beta_{\text{gene}})^T (G - X\beta_{\text{gene}}) + \lambda_{\beta_G} (\beta_{\text{gene}} \beta_{\text{gene}}^T) \Lambda_G]\right) \end{aligned} \quad (\text{S18})$$

Then, the parameters of the Gaussian (mean and precision) can be reformulated as:

$$\begin{aligned} & P(\beta_{\text{gene}} | \mu_{\text{gene}}, \Lambda_G, G, x, \lambda_{\beta_{\text{gene}}}) \\ & \propto \exp\left(-\frac{1}{2} \text{vec}(\beta_{\text{gene}} - \hat{\beta}_{\text{gene}})^T (\Lambda_G \otimes (X^T X + \lambda_{\beta_{\text{gene}}} I)) \text{vec}(\beta_{\text{gene}} - \hat{\beta}_{\text{gene}})\right) \end{aligned} \quad (\text{S19})$$

where  $\hat{\beta}_{\text{gene}} = (X^T X + \lambda_{\beta_{\text{gene}}} I)^{-1} X^T G$  is the mean and  $\Lambda_G \otimes (X^T X + \lambda_{\beta_{\text{gene}}} I)$  is the precision of the posterior.

#### 1.5 Supplementary details of our assessment strategy

Table S1 shows the details of our first assessment strategy. As explained in the paper among 2625 disease-gene annotations extracted from OMIM database (Amberger et al., 2011), six random splits into 90% training (2363 annotations) and 10% (262 annotations) test data prepared. The generated test sets includes 131, 138, 148, 133, 150 and 139 diseases.

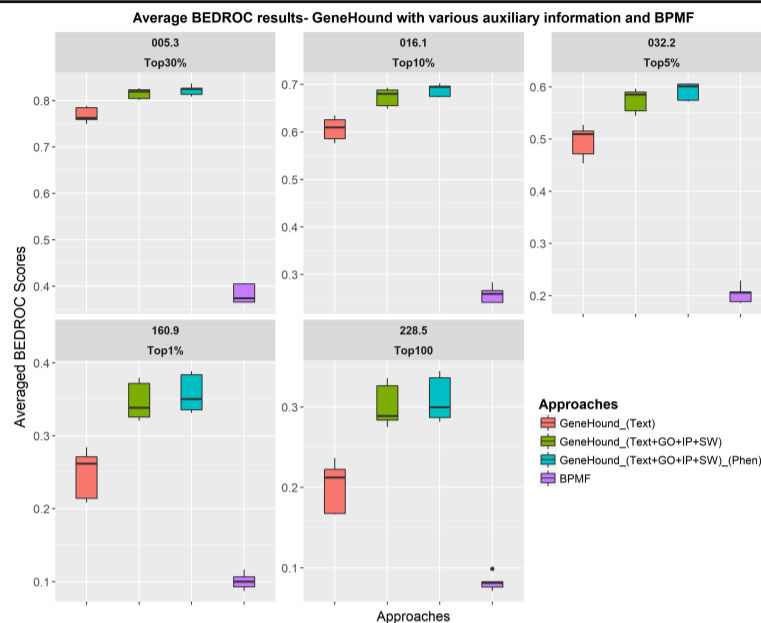

**Fig. S1.** Average BEDROC scores result: GeneHound with various side information vs BPF. The performance of GeneHound with various side information, and BPF are evaluated on OMIM1 benchmark. We use 40 latent dimensions for all proposed models. The label of each panel corresponds to the value of  $\alpha$  used to evaluate the model. A greater  $\alpha$ , emphasizes more on early recognition. BPF does not use side information, and consequently it fails to provide an accurate matrix completion. OMIM1 benchmark was designed to investigate the advantage of incorporating side information into matrix factorization process. The number of training genes on this benchmark for some diseases are too low to have a fair and accurate comparison with Endeavour. Accordingly, the OMIM2 benchmark was designed to have a fair comparison between Endeavour and our proposed method.

## 2 A detailed discussion of results

Table S1 shows 65 diseases that we use to evaluate our Bayesian data fusion model for gene prioritization. For each disease, the total number of available annotations in OMIM for these diseases used for both training and test are also reported in the Table S1.

Table S1: The 65 diseases that we investigated in this study. The total number of disease-linked genes (including the training and test) for each disease investigated in this work are listed. The OMIM diseases investigated in this study are grouped based on the 10th version of the International Statistical Classification of Diseases and Related Health Problems (ICD-10) (Icd, 2010).

| Diseases Name              | Number of genes | BEDROC scores<br>$\alpha = 160.9$ | ICD-10 chapter |
|----------------------------|-----------------|-----------------------------------|----------------|
| AIDS                       | 45              | 0.49                              | A              |
| Malaria                    | 16              | 0.28                              | A              |
| Mycobacterium tuberculosis | 11              | 0.31                              | A              |
| Colorectal cancer          | 55              | 0.34                              | C              |
| Gastric cancer             | 12              | 0.44                              | C              |
| Leukemia                   | 56              | 0.34                              | C              |
| Lipoma                     | 14              | 0.25                              | C              |
| Lung cancer                | 15              | 0.32                              | C              |

|                                               |     |      |         |
|-----------------------------------------------|-----|------|---------|
| Pancreatic cancer                             | 10  | 0.40 | C       |
| Prostate cancer                               | 15  | 0.19 | C       |
| Renal cell carcinoma                          | 15  | 0.26 | C       |
| Diamond-Blackfan anemia                       | 10  | 1.00 | D       |
| Fanconi anemia                                | 16  | 0.85 | D       |
| Immunodeficiency                              | 15  | 0.30 | D       |
| Neutropenia                                   | 13  | 0.09 | D       |
| Spherocytosis                                 | 16  | 0.31 | D       |
| Thrombocytopenia                              | 11  | 0.40 | D       |
| Ceroid lipofuscinosis                         | 10  | 0.74 | E       |
| Combined oxidative phosphorylation deficiency | 15  | 0.44 | E       |
| Congenital disorder of glycosylation          | 15  | 0.76 | E       |
| Glycogen storage disease                      | 16  | 0.74 | E       |
| Lipodystrophy                                 | 62  | 0.42 | E       |
| Obesity                                       | 24  | 0.33 | E       |
| Peroxisome biogenesis disorder                | 10  | 0.70 | E       |
| Premature ovarian failure                     | 10  | 0.27 | E       |
| Alzheimer disease                             | 14  | 0.37 | F       |
| Mental retardation                            | 82  | 0.59 | F and G |
| Parkinson disease                             | 16  | 0.60 | F and G |
| Amyotrophic lateral sclerosis                 | 41  | 0.58 | G       |
| Centronuclear myopathy                        | 30  | 0.46 | G       |
| Charcot-Marie-Tooth disease                   | 30  | 0.67 | G       |
| Dystonia                                      | 13  | 0.24 | G       |
| Epilepsy                                      | 29  | 0.55 | G       |
| Epileptic encephalopathy                      | 14  | 0.47 | G       |
| Leigh syndrome                                | 19  | 0.45 | G       |
| Miller syndrome                               | 14  | 0.31 | G       |
| Neuronopathy                                  | 23  | 0.49 | G       |
| Spastic paraplegia                            | 11  | 0.57 | G       |
| Spinal muscular atrophy                       | 10  | 0.50 | G       |
| Cataract                                      | 28  | 0.57 | H and Q |
| Retinitis pigmentosa                          | 122 | 0.58 | H       |
| Usher syndrome                                | 11  | 0.86 | H       |
| Deafness                                      | 74  | 0.79 | H2      |
| Cardiac arrhythmia                            | 12  | 0.58 | I       |
| Coronary artery disease                       | 11  | 0.27 | I       |

|                                                       |    |      |    |
|-------------------------------------------------------|----|------|----|
| Left ventricular noncompaction                        | 46 | 0.55 | I  |
| Myocardial infarction                                 | 13 | 0.19 | I  |
| Asthma and nasal polyps                               | 16 | 0.20 | J  |
| Ciliary dyskinesia                                    | 18 | 0.72 | J  |
| Rheumatoid arthritis                                  | 10 | 0.25 | M  |
| Systemic lupus erythematosus susceptibility           | 12 | 0.35 | M  |
| Spermatogenic failure                                 | 30 | 0.25 | N  |
| Bardet-Biedl syndrome                                 | 17 | 0.84 | Q  |
| CHARGE syndrome                                       | 14 | 0.02 | Q  |
| Ectodermal dysplasia                                  | 10 | 0.35 | Q  |
| Ehlers-Danlos syndrome                                | 10 | 0.52 | Q  |
| Ichthyosis                                            | 14 | 0.31 | Q  |
| Joubert syndrome                                      | 27 | 0.76 | Q  |
| Meckel syndrome                                       | 16 | 0.66 | Q  |
| Metaphyseal anadysplasia                              | 13 | 0.34 | Q  |
| Microcephaly                                          | 15 | 0.22 | Q  |
| Osteogenesis imperfecta                               | 21 | 0.44 | Q  |
| Osteopetrosis                                         | 14 | 0.46 | Q  |
| Hypogonadotropic hypogonadism with or without anosmia | 19 | 0.40 | R  |
| Mitochondrial complex deficiency                      | 28 | 0.64 | NA |

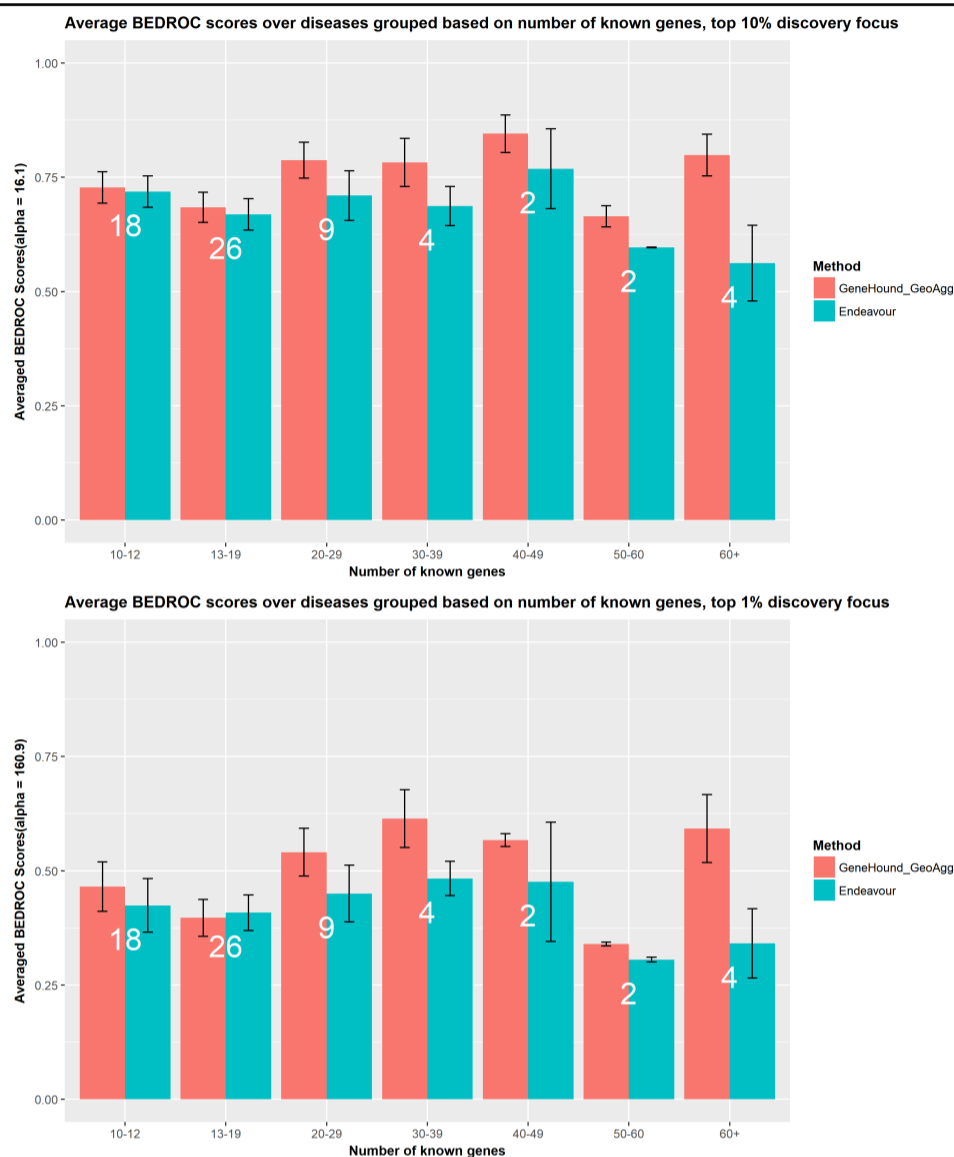

**Fig. S2.** The average BEDROC scores over diseases grouped based on the number of known genes for 2 different enrichment focuses. GeneHound and Endeavour are evaluated on OMIM1 benchmark. The label of each bar corresponds to the number of diseases in each group. A greater  $\alpha$ , emphasizes more on early recognition.

Figure S2 shows that GeneHound improves the predictive performance at top 1% enrichment focus by 9.68% on diseases with 10, 11, and 12 known genes, 20.11% on diseases with 20 to 29 known genes, 27.13% on diseases with 30 to 39 known genes, 19.27% on diseases with 40 to 49 known genes, 11.12% on diseases with 50 to 59 known genes, and 73.74% on diseases with at least 60 training genes, whereas the largest performance drop was 2.73% on diseases with 13 to 19 known genes. These results indicate that our proposed gene prioritization method can enhance the predictive performance of gene prioritization task by employing the multi-task approach.

### Author's contributions

PZ, JS, AA and YM conceived, designed and developed the study and models. PZ developed and performed the experiments. PZ and JS analyzed the results. PZ and SE developed data sources and benchmarks. PZ wrote the manuscript and all authors edited and improved the manuscript. All authors read and approved the final manuscript.



Table S2. Early discovery improvements challenge: GeneHound vs Endeavour. It is observed that GeneHound improves the BEDROC score (at  $\alpha = 228.5$  which corresponds to top 1% early discovery focus) obtained using Endeavour by more than 50% and 100% for twelve and three diseases, respectively. This compares to three and zero BEDROC score improvements of diseases in OMIM2 benchmark using Endeavour.

| Methods                      | Disease names                                                                                                                                                                                                                                                                                                |                |
|------------------------------|--------------------------------------------------------------------------------------------------------------------------------------------------------------------------------------------------------------------------------------------------------------------------------------------------------------|----------------|
| Early enrichment improvement | more than 50%                                                                                                                                                                                                                                                                                                | more than 100% |
| GeneHound improves Endeavour | Ceroid lipofuscinosis (E)<br>Charcot-Marie-Tooth (H2)<br>Deafness(H2)<br>Osteogenesis imperfecta (Q)<br>Epilepsy(G)<br>Gastric cancer(C)<br>Lipoma(C)<br>Spinal muscular atrophy (G)<br>Amyotrophic lateral sclerosis (G)<br>Retinitis pigmentosa (H)<br>Mental retardation(F)<br>Coronary artery disease(I) |                |
| Endeavour improves GeneHound | Ectodermal dysplasia (Q)<br>Microcephaly (Q)<br>Spherocytosis (D)                                                                                                                                                                                                                                            |                |
| Final Results                | 12-3                                                                                                                                                                                                                                                                                                         | 4-0            |

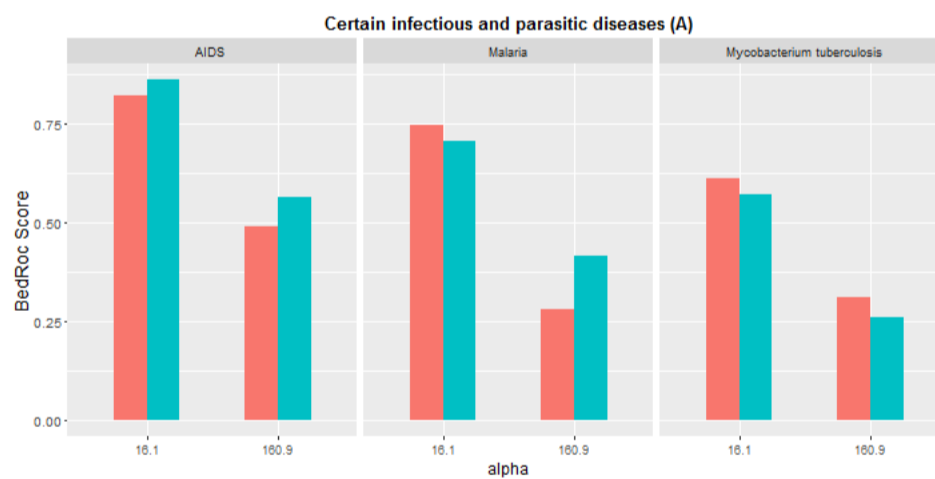

**Fig. S3.** BEDROC scores result for the Certain infectious and parasitic diseases(A). The left bar shows the result of the GeneHound, and the right bar indicates the result of Endeavour (Auhtor et al. , 2006; Tranchevent *et al.*, 2016)

## References

- Mnih A, Salakhutdinov R. Probabilistic matrix factorization. In *Advances in neural information processing systems (NIPS)*. 2007;1257-1264.
- Amberger J, Bocchini C, Hamosh A. A new face and new challenges for Online Mendelian Inheritance in Man (OMIM). *Hum Mutat*. 2011;32(5):564-567.

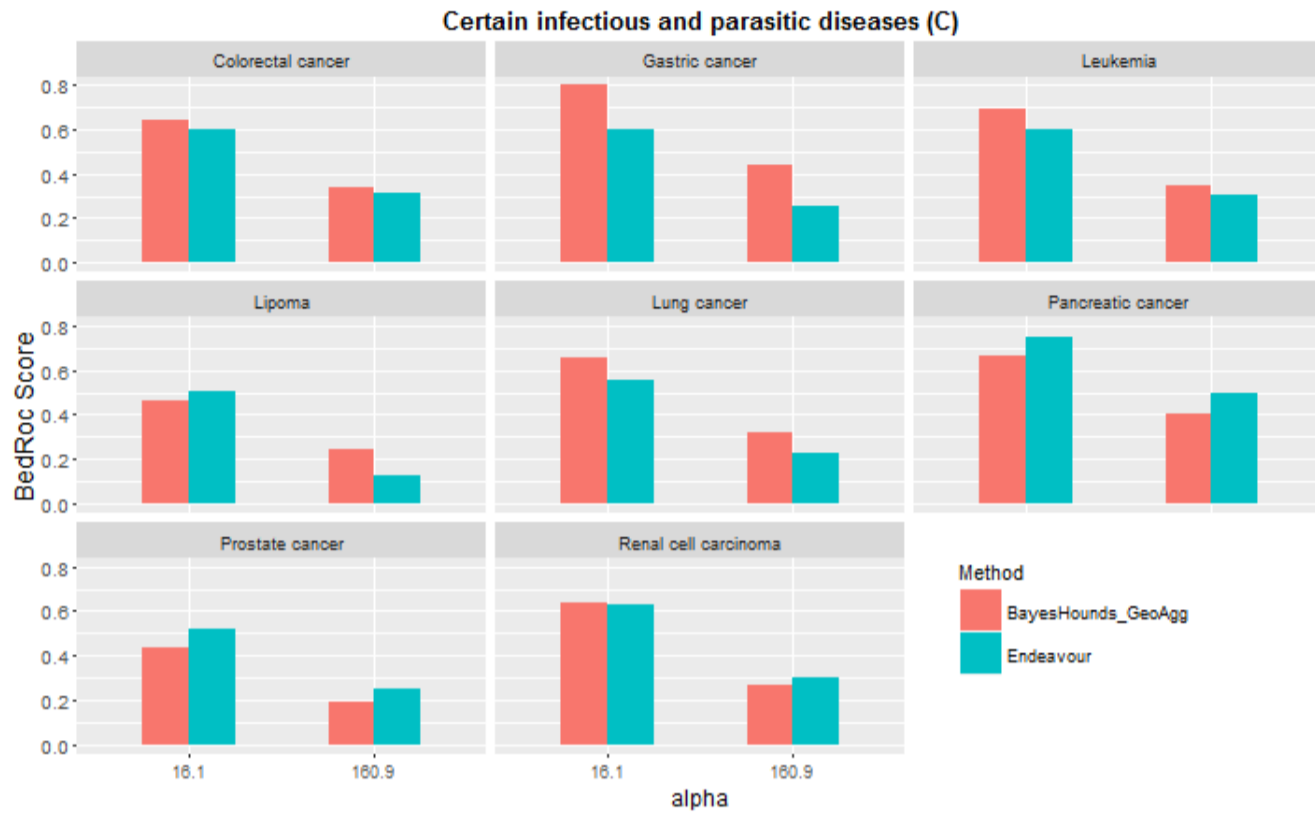

Fig. S4. BEDROC scores result for diseases classified as the Neoplasm (C) in ICD-10.

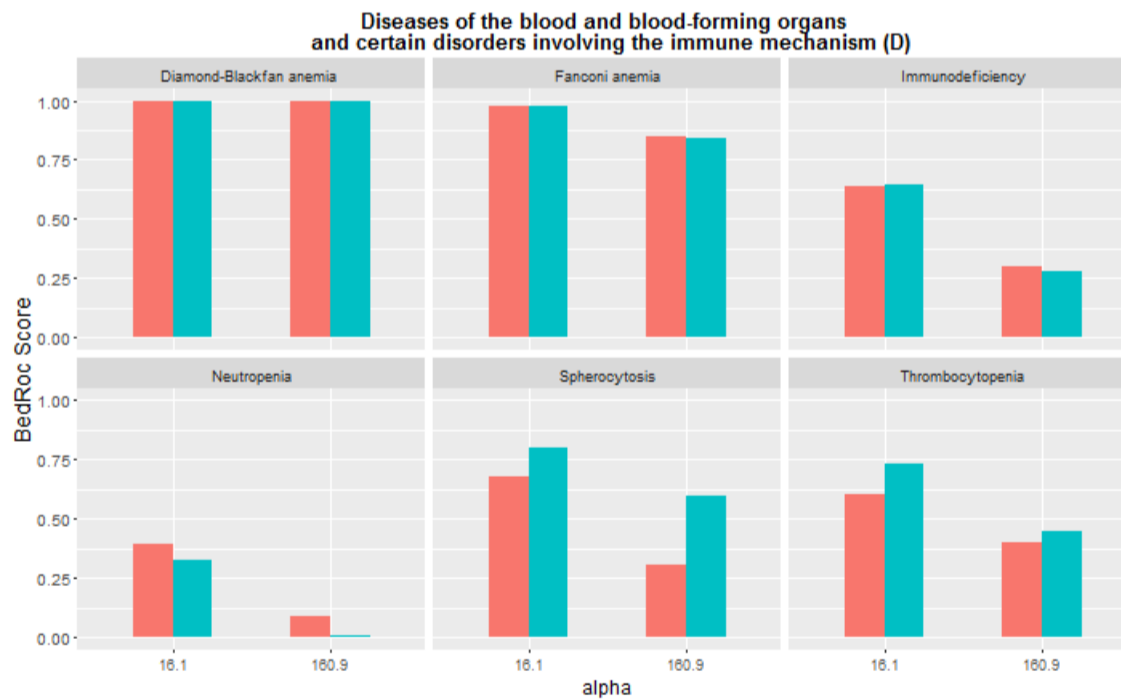

Fig. S5. BEDROC scores result for the disease of the blood and blood-forming organs and certain disorders involving the immune mechanism (D).

Aerts S, et al. Gene prioritization through genomic data fusion. *Nat Biotech*, 2006;24(5):537-544.

Porteous I, Asuncion AU, Welling M. Bayesian matrix factorization with side information and dirichlet process mixtures. in *AAAI Conference on Artificial Intelligence*, 2010.

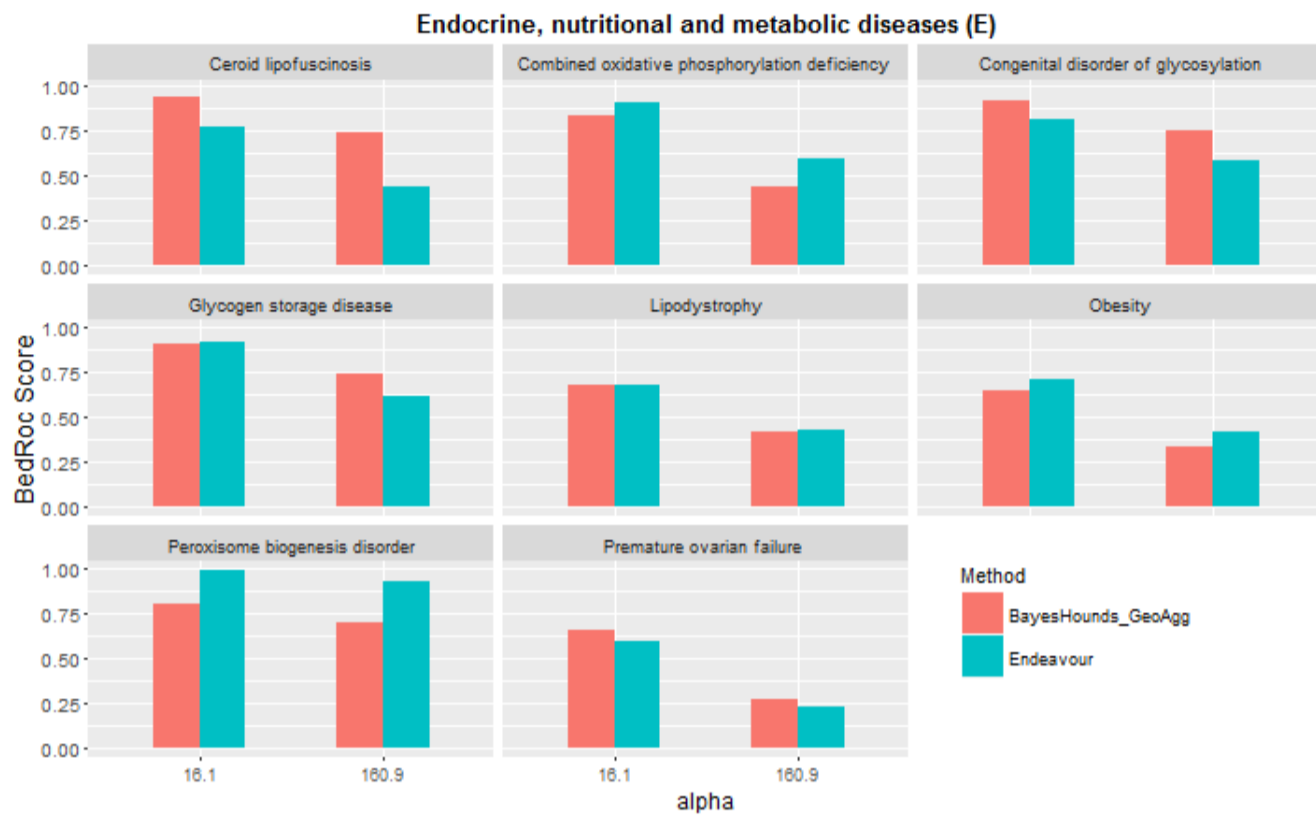

Fig. S6. BEDROC scores result for the endocrine, nutritional and metabolic diseases(E).

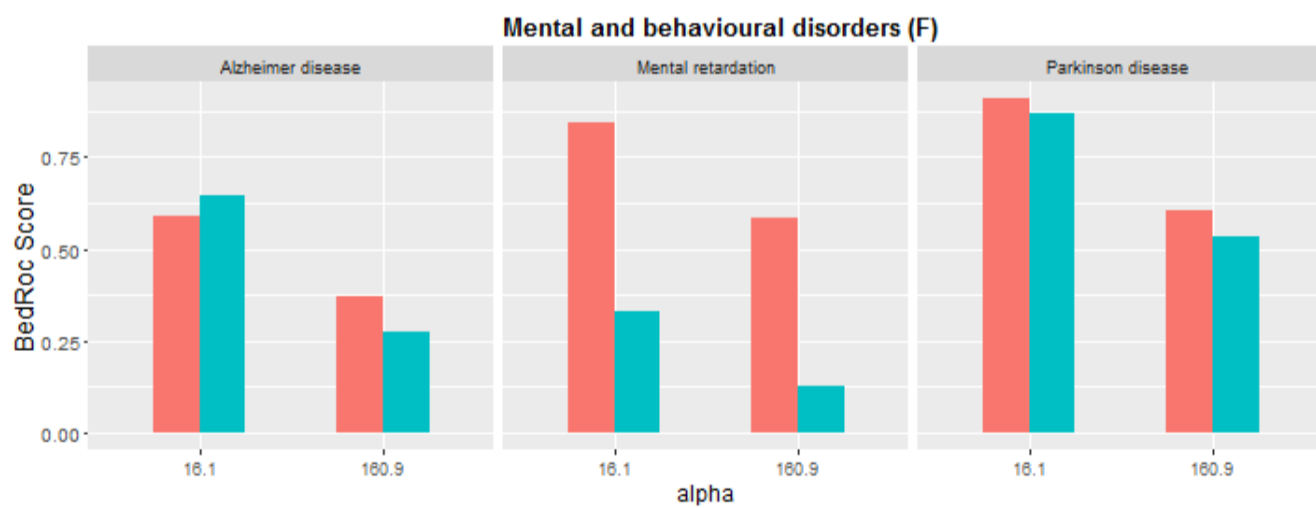

Fig. S7. BEDROC scores result for the disease of Mental and behavioural disorders (F).

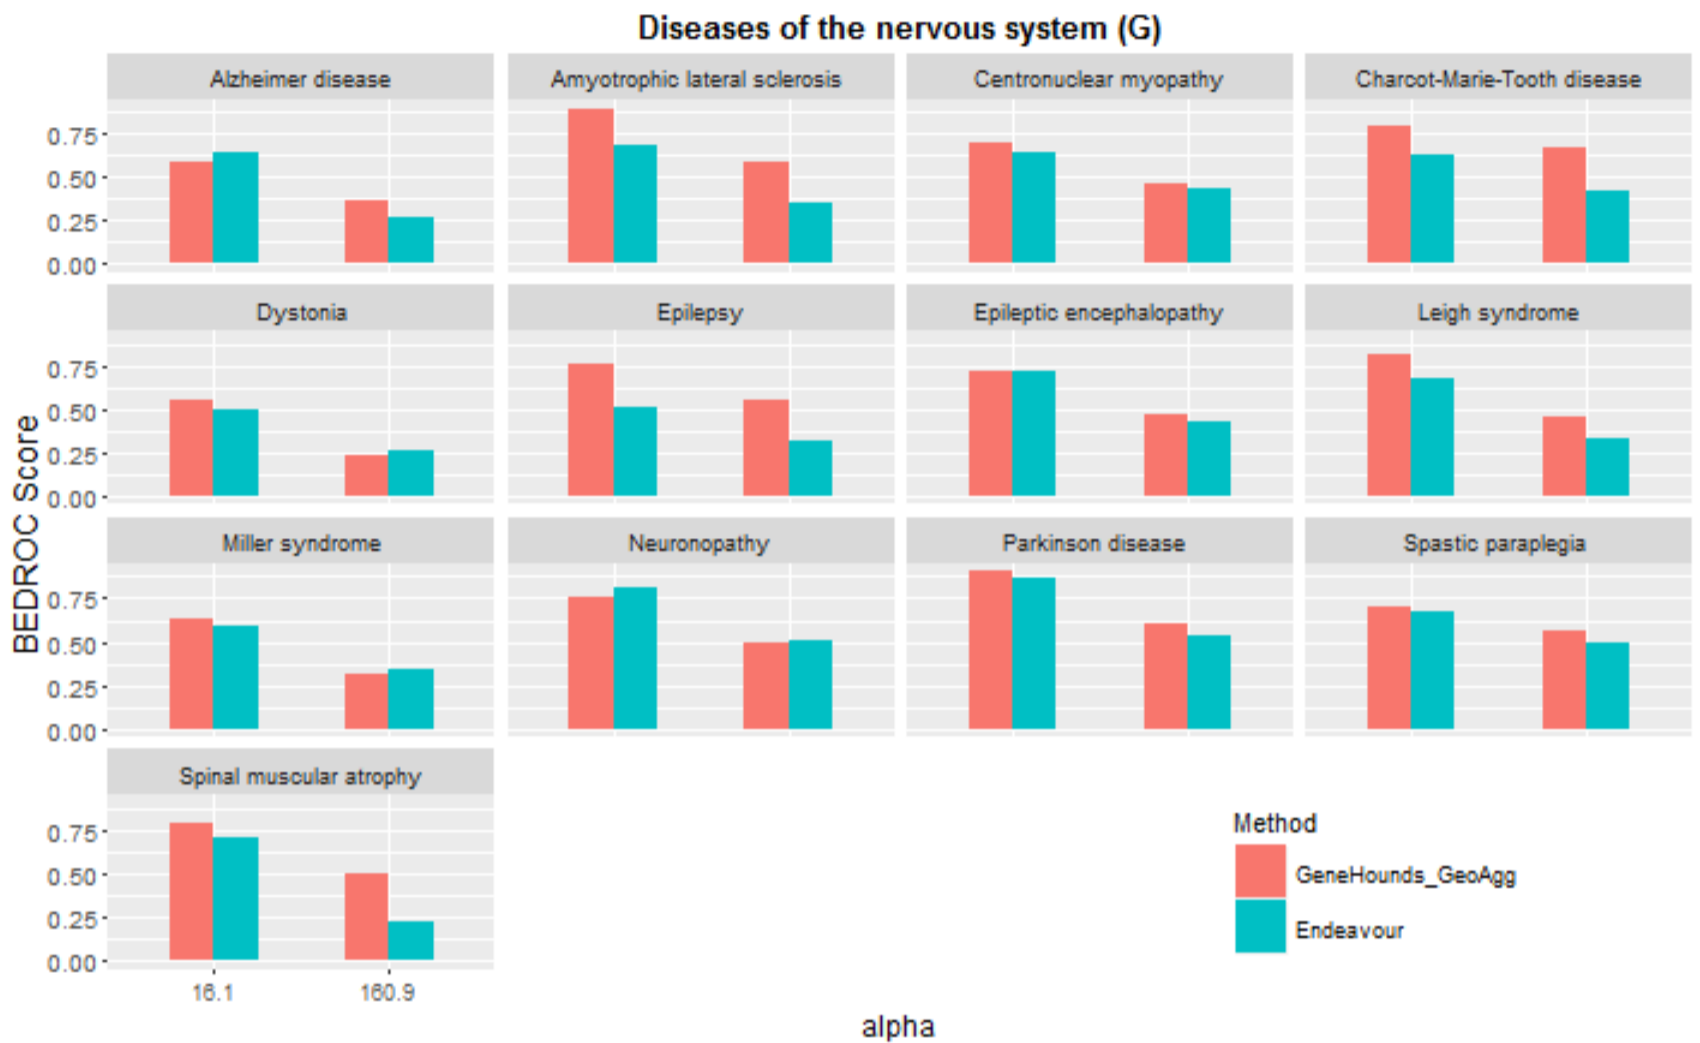

**Fig. S8.** BEDROC scores result for diseases of the nervous system (G). BEDROC score for each disease is calculated over all cross-validated genes. The  $\alpha$  are set to 16.1 and 160.9 which correspond to 80% of the BEDROC being assigned to the top 10% and 1% prioritized genes. The left bar shows the result of *GeneHound\_GeoAgg*, and the right bar indicates the result of Endeavour. *GeneHound\_GeoAgg* offers the best average BEDROC score of 0.73 and 0.48 overall diseases of the nervous system score at 10% and 1% early discovery focuses, respectively. This compares to 0.66 and 0.37 using Endeavour.

Salakhutdinov R, Mnih A. Bayesian probabilistic matrix factorization using markov chain monte carlo. in Proceedings of the 25th international conference on Machine learning (ACM). 2008;pp. 880-887.

Tranchevent LC, et al. Candidate gene prioritization with Endeavour. Nucleic Acids Res. 2016;44(W1):W117-W121.

International Classification of Diseases, Tenth Revision, Clinical Modification. Retrieved 2015, <https://www.cdc.gov>.

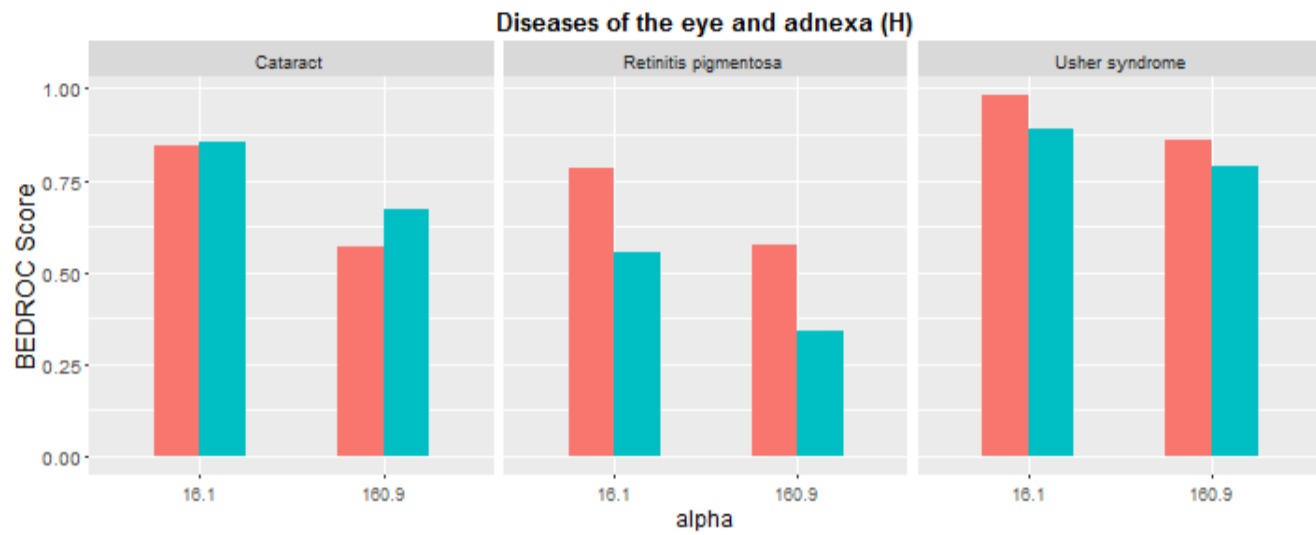

**Fig. S9.** BEDROC scores result for diseases of the eye and adnexa (H). BEDROC score for each disease is calculated over all cross-validated genes. *GeneHound\_GeoAgg* offers the very promising average BEDROC scores of 0.86 and 0.66 overall diseases of the eye and adnexa score at 10% and 1% early discovery focuses, respectively. These are versus 0.66 and 0.37 using Endeavour enrichment focuses.

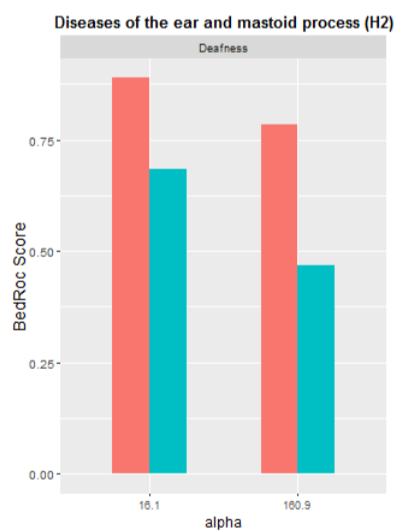

**Fig. S10.** BEDROC scores result for the disease of ear and mastoid process (H2).

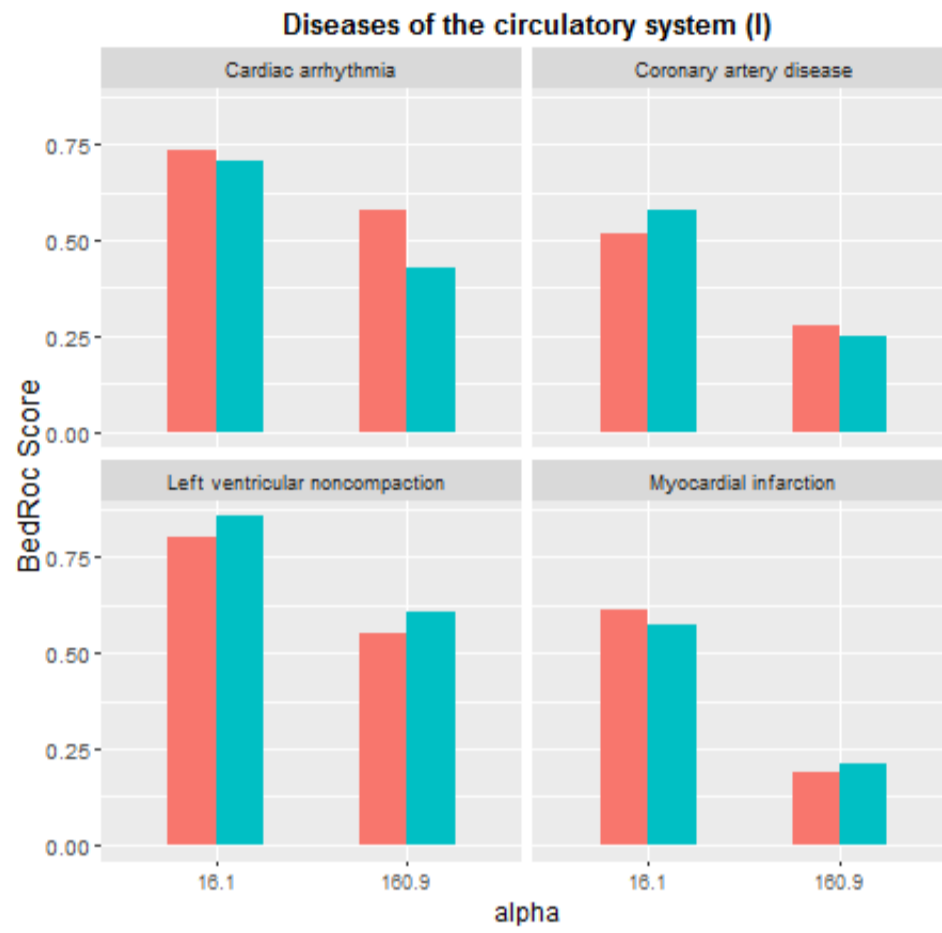

Fig. S11. BEDROC scores result for the disease of the circulatory system (I).

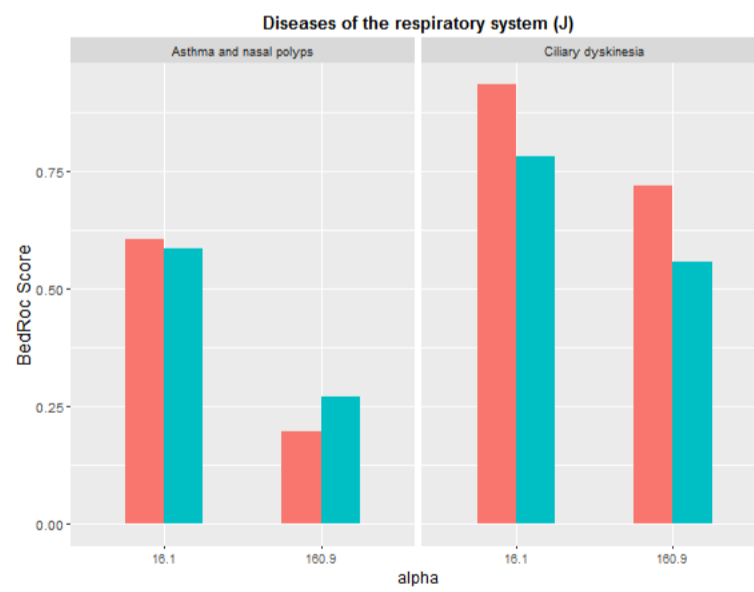

Fig. S12. BEDROC scores result for the disease of the respiratory system (J).

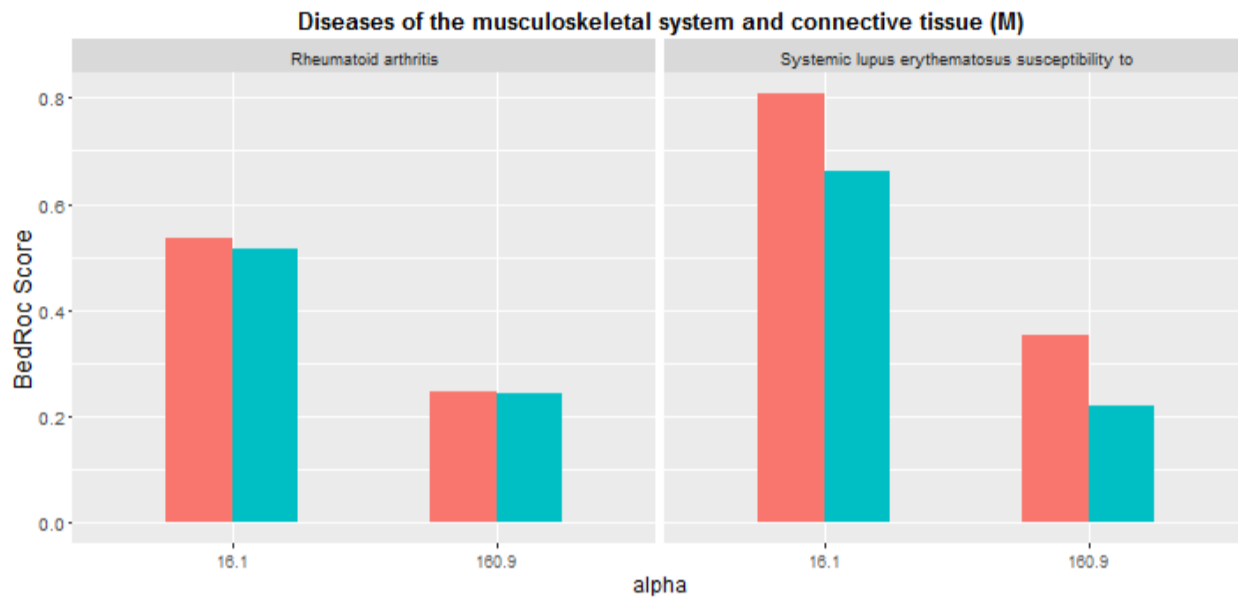

Fig. S13. BEDROC scores result for the disease of musculoskeletal connective tissue (M).

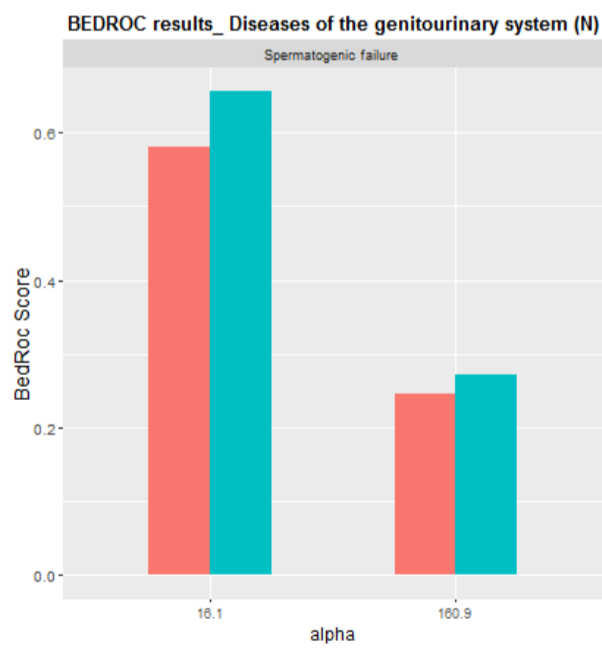

Fig. S14. BEDROC scores result for the disease of the genitourinary system (N).

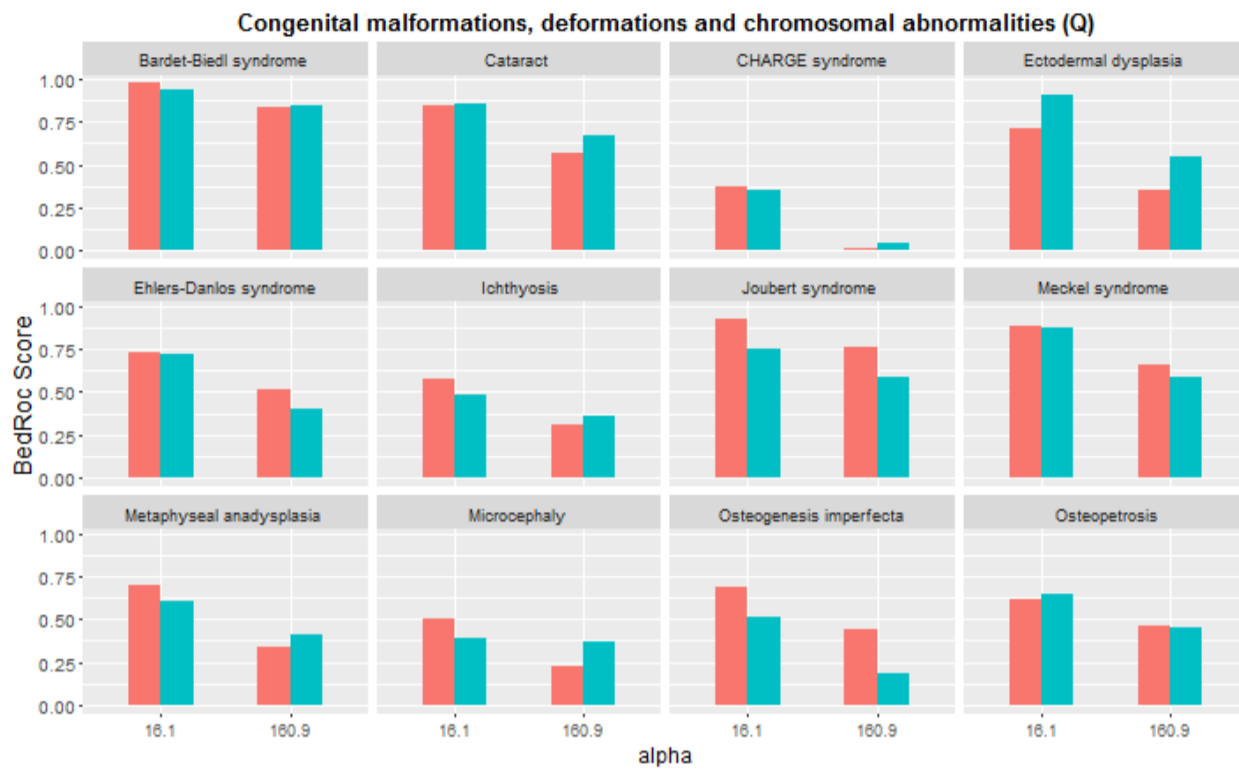

Fig. S15. BEDROC scores result for the congenital malformations, deformations and chromosomal abnormalities (Q).

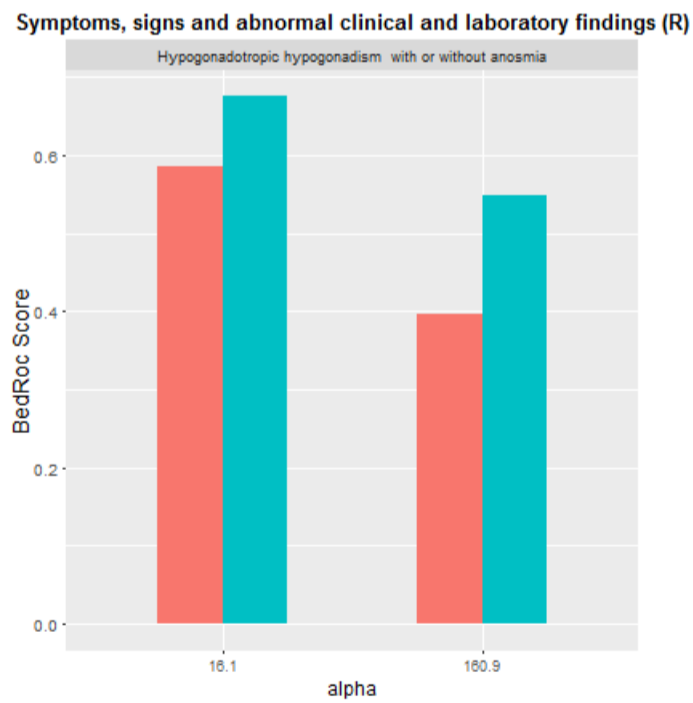

Fig. S16. BEDROC scores result for the disease of symptoms, signs and abnormal clinical and laboratory findings (R).



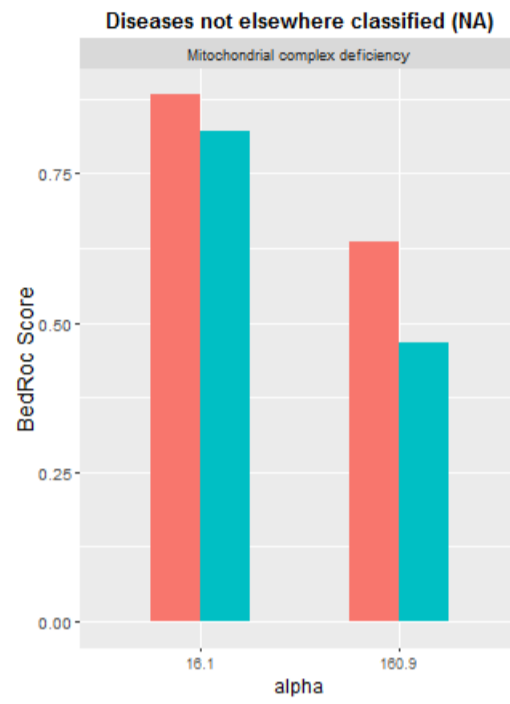

Fig. S17. BEDROC scores result for the Mitochondrial complex deficiency (NA) Mitochondrial complex deficiency is not classified in ICD-10.
